# Supplementary material for: Đakrông virus, a novel mobatvirus (Hantaviridae) harbored by the Stoliczka’s Asian trident bat (Aselliscus stoliczkanus) in Vietnam
Source: Springer Nature journal article supplement (doi:10.1038/s41598-019-46697-5), 2019-07-15
Supplement: 41598_2019_46697_MOESM1_ESM.pdf [file 41598_2019_46697_MOESM1_ESM.pdf]

1 **Supplementary information**

2 **Dakrông virus, a novel mobatvirus (*Hantaviridae*) harbored by the Stoliczka's**  
3 **Asian trident bat (*Aselliscus stoliczkanus*) in Vietnam**

4

5 **Author information**

6 Satoru Arai<sup>1</sup>, Keita Aoki<sup>1,2</sup>, Nguyễn Trường Sơn<sup>3,4</sup>, Vương Tân Tú<sup>3,4</sup>, Fuka Kikuchi<sup>1,2</sup>,  
7 Gohta Kinoshita<sup>5</sup>, Dai Fukui<sup>6</sup>, Hoàng Trung Thành<sup>7</sup>, Se Hun Gu<sup>8</sup>, Yasuhiro  
8 Yoshikawa<sup>9</sup>, Keiko Tanaka-Taya<sup>1</sup>, Shigeru Morikawa<sup>10</sup>, Richard Yanagihara<sup>8</sup>, Kazunori  
9 Oishi<sup>1</sup>

10

11 <sup>1</sup> Infectious Disease Surveillance Center, National Institute of Infectious Diseases,  
12 Tokyo 162-8640, Japan

13 <sup>2</sup> Tokyo University of Science, Tokyo 162-8601, Japan

14 <sup>3</sup> Institute of Ecology and Biological Resources, Vietnam Academy of Science and  
15 Technology, Hanoi, Vietnam

16 <sup>4</sup> Graduate University of Science and Technology, Vietnam Academy of Science and  
17 Technology, Hanoi, Vietnam

18 <sup>5</sup> Kyoto University Graduate School of Agriculture, Kyoto 606-8502, Japan

19 <sup>6</sup> The University of Tokyo Hokkaido Forests, Graduate School of Agricultural and Life  
20 Sciences, The University of Tokyo, Furano, Hokkaido 079-1561, Japan

21 <sup>7</sup> Faculty of Biology, University of Science, Vietnam National University, Hanoi,  
22 Vietnam

23 <sup>8</sup> Pacific Center for Emerging Infectious Diseases Research, John A. Burns School of  
24 Medicine, University of Hawaii at Manoa, Honolulu, HI 96813, USA

25 <sup>9</sup> Chiba Institute of Science, Chiba 388-0025, Japan

26 <sup>10</sup> Department of Veterinary Science, National Institute of Infectious Diseases, Tokyo  
27 162-8640, Japan

Supplemental Table 1. Bat samples analyzed for hantavirus RNA.

| Family           | Species                            | 2012     | 2013                     | 2014                         |               |                        |                        |                                     |                          | Total     |                       |                         |          |            |
|------------------|------------------------------------|----------|--------------------------|------------------------------|---------------|------------------------|------------------------|-------------------------------------|--------------------------|-----------|-----------------------|-------------------------|----------|------------|
|                  |                                    | Location | Xuan Lien Nature Reserve | Bac Huong Hoa Nature Reserve | Cu Chi Tunnel | Dakrong Nature Reserve | Khau Ca Nature Reserve | Dong Nai Culture and Nature Reserve | Hoang Lien National Park |           | Nahang Nature Reserve | Ngoc Son Nature Reserve |          |            |
| Hipposideridae   |                                    |          |                          |                              |               |                        |                        |                                     |                          |           |                       |                         |          |            |
|                  | <i>Aselliscus dongbacana</i>       |          |                          | 20                           |               | 10                     |                        | 7                                   |                          | 3         | 15                    | 3                       | 53       |            |
|                  | <i>Aselliscus stoliczkanus</i>     |          |                          | 10                           |               | 2                      |                        | 2                                   |                          |           | 5                     |                         | 12       |            |
|                  | <i>Hipposideros armiger</i>        |          |                          | 1                            |               | 1                      |                        |                                     | 3                        | 2         |                       |                         | 7        |            |
|                  | <i>Hipposideros cf. larvatus 1</i> |          |                          | 3                            |               | 3                      |                        |                                     |                          |           |                       |                         | 6        |            |
|                  | <i>Hipposideros cf. larvatus 2</i> |          |                          |                              |               |                        |                        | 3                                   |                          | 3         |                       |                         | 6        |            |
|                  | <i>Hipposideros cf. larvatus 3</i> |          |                          | 1                            |               |                        |                        |                                     |                          |           |                       |                         | 1        |            |
|                  | <i>Hipposideros pomona 1</i>       |          |                          |                              |               |                        |                        | 2                                   |                          |           | 3                     | 3                       | 8        |            |
|                  | <i>Hipposideros pomona 2</i>       |          |                          |                              |               | 3                      |                        |                                     |                          |           |                       |                         | 3        |            |
|                  | <i>Hipposideros pratti</i>         |          |                          | 3                            |               |                        |                        |                                     |                          |           |                       |                         | 3        |            |
| Megadermatidae   |                                    |          |                          | 1                            |               |                        |                        |                                     |                          |           |                       |                         | 1        |            |
|                  | <i>Megaderma spasma</i>            |          |                          | 1                            |               |                        |                        |                                     |                          |           |                       |                         | 1        |            |
| Pteropodidae     |                                    |          | 2                        |                              |               |                        |                        | 2                                   |                          | 6         |                       |                         | 10       |            |
|                  | <i>Cynopterus cf. branchyotis</i>  |          |                          |                              |               |                        |                        |                                     |                          | 3         |                       |                         | 3        |            |
|                  | <i>Cynopterus cf. sphinx</i>       |          | 2                        |                              |               |                        |                        | 2                                   |                          |           |                       |                         | 4        |            |
|                  | <i>Cynopterus horsfieldi</i>       |          |                          |                              |               |                        |                        |                                     |                          | 1         |                       |                         | 1        |            |
|                  | <i>Megaderops niphanae</i>         |          |                          |                              |               |                        |                        |                                     |                          | 2         |                       |                         | 2        |            |
| Rhinolophidae    |                                    |          | 8                        | 15                           | 1             | 16                     |                        | 10                                  |                          | 7         | 16                    | 9                       | 82       |            |
|                  | <i>Rhinolophus acuminatus</i>      |          |                          |                              |               |                        |                        |                                     |                          | 3         |                       |                         | 3        |            |
|                  | <i>Rhinolophus affinis</i>         |          | 3                        | 3                            |               | 3                      |                        | 1                                   |                          | 3         |                       |                         | 13       |            |
|                  | <i>Rhinolophus cf. macrotis</i>    |          |                          |                              |               |                        |                        |                                     |                          | 1         |                       |                         | 1        |            |
|                  | <i>Rhinolophus cf. pusillus</i>    |          |                          |                              |               | 1                      |                        |                                     |                          | 3         |                       | 2                       | 6        |            |
|                  | <i>Rhinolophus cf. siamensis</i>   |          | 1                        | 1                            |               | 1                      |                        | 1                                   |                          | 2         |                       | 1                       | 7        |            |
|                  | <i>Rhinolophus cf. thomasi</i>     |          |                          |                              |               |                        |                        | 2                                   |                          | 3         |                       | 1                       | 6        |            |
|                  | <i>Rhinolophus luctus</i>          |          |                          |                              |               |                        |                        |                                     | 1                        |           |                       |                         | 1        |            |
|                  | <i>Rhinolophus malayanus</i>       |          |                          | 3                            |               | 3                      |                        |                                     |                          |           |                       |                         | 6        |            |
|                  | <i>Rhinolophus microglobosus</i>   |          | 2                        |                              |               | 2                      |                        | 1                                   |                          |           |                       | 3                       | 8        |            |
|                  | <i>Rhinolophus monoceros</i>       |          |                          | 3                            |               |                        |                        |                                     |                          |           |                       |                         | 3        |            |
|                  | <i>Rhinolophus paradoxolophus</i>  |          |                          | 1                            |               |                        |                        | 2                                   |                          |           |                       | 1                       | 4        |            |
|                  | <i>Rhinolophus pearsonii 1</i>     |          | 2                        |                              |               |                        |                        |                                     |                          |           |                       |                         | 2        |            |
|                  | <i>Rhinolophus pearsonii 2</i>     |          |                          | 1                            |               | 3                      |                        |                                     |                          |           |                       |                         | 4        |            |
|                  | <i>Rhinolophus pearsonii 3</i>     |          |                          |                              |               |                        |                        |                                     |                          | 1         |                       |                         | 1        |            |
|                  | <i>Rhinolophus pearsonii 4</i>     |          |                          |                              |               |                        |                        | 3                                   |                          | 2         |                       | 1                       | 6        |            |
|                  | <i>Rhinolophus sinicus</i>         |          | 3                        |                              | 1             | 3                      |                        |                                     | 3                        | 1         |                       |                         | 11       |            |
| Vespertilionidae |                                    |          | 4                        | 8                            |               | 5                      |                        | 5                                   |                          | 17        | 17                    | 13                      | 69       |            |
|                  | <i>Harpiola isodon</i>             |          |                          |                              |               |                        |                        |                                     |                          |           | 1                     |                         | 1        |            |
|                  | <i>Hypsugo cadornae</i>            |          |                          |                              |               |                        |                        | 1                                   |                          |           |                       |                         | 1        |            |
|                  | <i>Kerivoula cf. papillosa</i>     |          |                          |                              |               |                        |                        |                                     | 3                        |           |                       |                         | 3        |            |
|                  | <i>Kerivoula cf. titania</i>       |          |                          | 1                            |               |                        |                        |                                     |                          |           |                       | 3                       | 4        |            |
|                  | <i>Kerivoula depressa</i>          |          |                          | 1                            |               |                        |                        |                                     |                          |           |                       |                         | 1        |            |
|                  | <i>Kerivoula dongduongana</i>      |          |                          | 1                            |               |                        |                        | 1                                   |                          |           |                       |                         | 2        |            |
|                  | <i>Kerivoula furva</i>             |          |                          |                              |               |                        |                        | 1                                   |                          | 1         |                       |                         | 2        |            |
|                  | <i>Kerivoula hardwickii</i>        |          |                          |                              |               |                        |                        |                                     | 2                        |           |                       |                         | 2        |            |
|                  | <i>Kerivoula kachinensis</i>       |          |                          |                              |               |                        |                        |                                     |                          |           |                       | 3                       | 3        |            |
|                  | <i>Miniopterus magnater</i>        |          |                          | 3                            |               |                        |                        |                                     |                          |           |                       |                         | 3        |            |
|                  | <i>Murina sp.</i>                  |          |                          |                              |               |                        |                        |                                     |                          | 2         |                       |                         | 2        |            |
|                  | <i>Murina cf. huttoni</i>          |          |                          |                              |               |                        |                        |                                     |                          | 3         |                       |                         | 3        |            |
|                  | <i>Murina cyclotis</i>             |          |                          |                              |               | 2                      |                        |                                     |                          |           |                       |                         | 2        |            |
|                  | <i>Murina feae</i>                 |          |                          | 1                            |               |                        |                        |                                     |                          |           |                       | 1                       | 2        |            |
|                  | <i>Murina tubinaris</i>            |          |                          |                              |               |                        |                        | 1                                   |                          |           |                       | 3                       | 4        |            |
|                  | <i>Myotis annamiticus</i>          |          |                          | 1                            |               | 3                      |                        |                                     |                          |           |                       |                         | 4        |            |
|                  | <i>Myotis annectans</i>            |          |                          |                              |               |                        |                        | 1                                   |                          |           |                       |                         | 1        |            |
|                  | <i>Myotis cf. montivagus</i>       |          |                          |                              |               |                        |                        |                                     |                          | 1         |                       |                         | 1        |            |
|                  | <i>Myotis laniger</i>              |          | 3                        |                              |               |                        |                        |                                     |                          | 3         |                       | 2                       | 8        |            |
|                  | <i>Myotis muricola</i>             |          | 1                        |                              |               |                        |                        |                                     |                          |           |                       |                         | 4        |            |
|                  | <i>Myotis rosetti</i>              |          |                          |                              |               |                        |                        |                                     |                          | 2         |                       |                         | 2        |            |
|                  | <i>Phoniscus jagorii</i>           |          |                          |                              |               |                        |                        |                                     | 1                        |           |                       | 1                       | 2        |            |
|                  | <i>Plecotus homochrous</i>         |          |                          |                              |               |                        |                        |                                     |                          | 4         |                       |                         | 4        |            |
|                  | <i>Scotomanes ornatus</i>          |          |                          |                              |               |                        |                        |                                     |                          | 2         |                       |                         | 2        |            |
|                  | <i>Tylonycteris fulvidus</i>       |          |                          |                              |               |                        |                        |                                     | 3                        |           |                       |                         | 3        |            |
|                  | <i>Tylonycteris pachypus</i>       |          |                          |                              |               |                        |                        |                                     | 3                        |           |                       |                         | 3        |            |
|                  | <b>Total</b>                       |          | <b>14</b>                | <b>44</b>                    | <b>1</b>      | <b>31</b>              |                        | <b>24</b>                           |                          | <b>30</b> | <b>36</b>             | <b>37</b>               | <b>3</b> | <b>215</b> |

Supplemental table 2

Oligonucleotide primers for amplification of the full-length S, M and L segments of DKGV strain 2913B72.

|           | Primer name  | Sequences (5'-3')          | Polarity |
|-----------|--------------|----------------------------|----------|
| S segment | HTS-3R       | TAGTAGTAIGCTCCYT           | -        |
|           | S-437F       | SWG GTCARACTGCHRAYTGG      | +        |
|           | Cro2R(1126R) | AIGAYTGR TAAAAIGAIGAYTTYTT | -        |
|           | Cro2F(685F)  | AGYCCIGTIATGRGWGTIRTYGG    | +        |
|           | XSV-S6R      | AGITCIGGRTCCATRTCRTCICC    | -        |
|           | DGS-453R     | GTARAAGGRAATGTCASCAGGT     | -        |
|           | DGS-596F     | TGTGTCACTTCCTACTGGTCAG     | +        |
|           | DGS-704R     | GAGCCTTAGTCTCWGCAGCRT      | -        |
|           | XSS-729R     | CCWATIACYCCCATKACWGGRCT    | -        |
|           | SMGS-1079F   | ATIATGGCWTCTAAGCTTGTYGG    | +        |
| M segment | XM-3endR     | TAGTAGTAKRCTCCGCARGA       | -        |
|           | MKWM-917R    | TRTCATGATCTTCICCATRTGG     | -        |
|           | T-M1199F     | TAAVTT CAMCAACATGTCT       | +        |
|           | T-M1485R     | CCAGCCAAARCARAATGT         | -        |
|           | HTM-1490F    | TGTGTICCWGGITTYCATGGIT     | +        |
|           | XSM-1973F    | CAKTAATATGGGCWKCTAGTGCA    | +        |
|           | XDM-2017R    | ACICCRTGWGCTGTRTCYTGCCA    | -        |
|           | HTM-2409R    | CCACAIGCWGTRCAICCWGT       | -        |
|           | MKWM-2631R   | CATGATRTCICCAGGRTCICC      | -        |
|           | XDM-2841F    | TIATGTGGKCTGAYCCWGATGG     | +        |
|           | XSM-2959R    | CTGAACCCCAWGMICCTTCAAT     | -        |
|           | XDM-3360F    | GKWTRTTYCAYGGMAACTGGTGG    | +        |
| L segment | HL-3endR     | TAGTAGTAKRCTCCGGA          | -        |
|           | PHL-173F     | GATWAAGCATGAYTGGTCTGA      | +        |
|           | XAL-948F     | CAATMTGAGTATTCMCCWKCTAC    | +        |
|           | XAL-1534F    | CAAARTWYTGGTCTGTYCATGC     | +        |
|           | XAL-2137F    | AGGWGCIAGTGGWGKTATCC       | +        |
|           | XSL-2227R    | TGCTTCTTCTGTCATWGTICCAYG   | -        |
|           | HAN-L-F1     | ATGTAYGTBAGTGCWGATGC       | +        |
|           | HAN-L-R1     | AACCADTCWGTGCCRTCATC       | -        |
|           | HAN-L-F2     | TGCWGATGCHACIAARTGGTC      | +        |
|           | HAN-L-R2     | GCRTCRCWGARTGRTGDGCAA      | -        |
|           | DGL-3225F    | TACGTGGIAATTGGTTGCARGG     | +        |
|           | XSL-3719F    | TRGCTGCTKCWCARASTMGKTGTG   | +        |
|           | PHL-5167R    | CATAYTGYYTHCCTGAATAWGC     | -        |
|           | HTL-5278F    | GTGCAAGSYTAGARATITYYTG G   | +        |
|           | XDL-5809R    | GCAYTAGGRGGRATWGATGCAGG    | -        |
|           | XDL-6088R    | GTAGRAAATGCTCWATGTCATC     | -        |

Mixed bases: B= G, T, C; D= G, A, T; H= A, T, C; K= G, T; M= A, C; N= A, T, G, C; R = A, G; W= A, T; and Y= C, T.

Supplemental table 3. Gene accession numbers of cytochrome b (Cytb) and related hantaviruses.

| Order         | Family           | Host species of virus             | Cytb      | Virus abbreviation | Clone        | S segment | M segment | L segment |
|---------------|------------------|-----------------------------------|-----------|--------------------|--------------|-----------|-----------|-----------|
| Chiroptera    | Hipposideridae   | <i>Aselliscus stoliczkanus</i>    | KU161570  | DKGV               | VN2913B72    | MG663534  | MG663535  | MG663536  |
| Chiroptera    | Hipposideridae   | <i>Hipposideros pomona</i>        | JX912954  | XSV                | VN1982B4     | KC688335  | KU976427  | JX912953  |
| Chiroptera    | Hipposideridae   | <i>Hipposideros ruber</i>         | EU934474  | MAKV               | GB303        | –         | –         | KT316176  |
| Chiroptera    | Emballonuridae   | <i>Taphozous melanopogon</i>      | LC406449  | LAIV               | BT20         | KM102247  | KM102248  | KM102249  |
| Chiroptera    | Pteropodidae     | <i>Rousettus amplexicaudatus</i>  | KU950716  | QZNV               | MT1720/1657  | KU950713  | KU950714  | KU950715  |
| Chiroptera    | Rhinolophidae    | <i>Rhinolophus affinis</i>        | JX465358  | LQUV               | Ra-25        | JX465415  | JX465397  | JX465381  |
| Chiroptera    | Vespertilionidae | <i>Nyctalus noctula</i>           | JX570902  | BRNV               | 7/2012/CZE   | KX845678  | KX845679  | KX845680  |
| Chiroptera    | Vespertilionidae | <i>Neoromicia nanus</i>           | EU797428  | MOYV               | KB576        | –         | –         | KJ000540  |
| Chiroptera    | Vespertilionidae | <i>Pipistrellus abramus</i>       | JX465352  | HUPV               | Pa-1         | JX473273  | –         | JX465369  |
| Chiroptera    | Nycteridae       | <i>Nycteris hispida</i>           | HQ693722  | MGBV               | 1209         | –         | –         | JN037851  |
| Eulipotyphla  | Soricidae        | <i>Myosorex geata</i>             | JX193701  | ULUV               | FMNH158302   | JX193695  | JX193696  | JX193697  |
| Eulipotyphla  | Soricidae        | <i>Myosorex zinki</i>             | JX193702  | KMJV               | FMNH174124   | JX193698  | JX193699  | JX193700  |
| Eulipotyphla  | Soricidae        | <i>Suncus murinus</i>             | DQ630386  | TPMV               | VRC66412     | AY526097  | EU001329  | EU001330  |
| Eulipotyphla  | Soricidae        | <i>Crocodyrus lasiura</i>         | KJ004674  | MJNV               | CI05-11      | EF641804  | EF641798  | EF641806  |
| Eulipotyphla  | Soricidae        | <i>Crocodyrus shantungensis</i>   | HQ663932  | JJUV               | SH42         | HQ663933  | HQ663934  | HQ663935  |
| Eulipotyphla  | Soricidae        | <i>Crocodyrus obscurior</i>       | KC684096  | AZGV               | KBM15        | JF276226  | JF276227  | JF276228  |
| Eulipotyphla  | Soricidae        | <i>Crocodyrus theresae</i>        | DQ521043  | TGNV               | Tan826       | EF050455  | –         | EF050454  |
| Eulipotyphla  | Soricidae        | <i>Crocodyrus doucetii</i>        | KC684929  | BOWV               | VN1512       | KC631782  | KC631783  | KC631784  |
| Eulipotyphla  | Soricidae        | <i>Anourosorex squamipe</i>       | AB175090  | CBNV               | CBN3         | EF543524  | EF543526  | EF543525  |
| Eulipotyphla  | Soricidae        | <i>Sorex caecutiens</i>           | KF974362  | ARTV               | MukawaAH301  | KF974360  | KF974359  | KF974361  |
| Eulipotyphla  | Soricidae        | <i>Sorex roboratus</i>            | AB175128  | KKMV               | MSB148794    | GQ306148  | GQ306149  | GD306150  |
| Eulipotyphla  | Soricidae        | <i>Sorex cinereus</i>             | FJ667512  | ARRV               | MSB734418    | EF650086  | –         | EF619961  |
| Eulipotyphla  | Soricidae        | <i>Sorex monticolus</i>           | FJ667514  | JMSV               | MSB144475    | FJ593499  | FJ593500  | FJ593501  |
| Eulipotyphla  | Soricidae        | <i>Sorex araneus</i>              | FJ667524  | SWSV               | mp70         | EF636024  | EF636025  | EF636026  |
| Eulipotyphla  | Soricidae        | <i>Neomys fodiens</i>             | KC537797  | BOGV               | 2074         | –         | JX990966  | JX990965  |
| Eulipotyphla  | Talpidae         | <i>Urotrichus talpoides</i>       | EU918371  | ASAV               | N10          | EU929072  | EU929075  | EU929078  |
| Eulipotyphla  | Talpidae         | <i>Scalopus aquaticus</i>         | HM461914  | RKPV               | MSB57412     | HM015223  | HM015222  | HM015221  |
| Eulipotyphla  | Talpidae         | <i>Talpa europaea</i>             | FJ175340  | NVAV               | Te34         | KR072621  | KR072622  | KR072623  |
| Eulipotyphla  | Talpidae         | <i>Neurotrichus gibbsii</i>       | FJ595237  | QXBV               | Ng1453       | FJ539166  | FJ539167  | FJ539497  |
| Rodentia      | Muridae          | <i>Apodemus agrarius</i>          | AB303225  | HTNV               | 76-118       | NC_005218 | NC_005219 | NC_5222   |
| Rodentia      | Muridae          | <i>Apodemus flavicollis</i>       | AY158451  | DOBVB/GDV          | Greece       | NC_005233 | NC_005234 | NC_005235 |
| Rodentia      | Muridae          | <i>Apodemus peninsulae</i>        | AB073811  | SOOV               | SOO-1        | AY675349  | AY675353  | DQ056292  |
| Rodentia      | Muridae          | <i>Rattus norvegicus</i>          | KY356141  | SEOV               | HR80-39      | NC_005236 | NC_005237 | NC_005238 |
| Rodentia      | Muridae          | <i>Hylomyscus simus</i>           | DQ212188  | SANGV              | SA14         | JQ082300  | JQ082301  | JQ082302  |
| Rodentia      | Muridae          | <i>Stenocephalemys albipes</i>    | AF518346  | TIGV               | ET2121       | KU934010  | KU934009  | KU934008  |
| Rodentia      | Cricetidae       | <i>Myodes glareolus</i>           | JX477304  | PUUV               | Sotkamo      | NC_005224 | NC_005223 | NC_005225 |
| Rodentia      | Cricetidae       | <i>Myodes regulus</i>             | NC_016427 | MUJV               | 11-1         | JX028273  | JX028272  | JX028271  |
| Rodentia      | Cricetidae       | <i>Myodes rufocanus</i>           | LC406450  | HOKV               | Kitahiyama   | AB675463  | AB676848  | AB712372  |
| Rodentia      | Cricetidae       | <i>Microtus pennsylvanicus</i>    | AF119279  | PHV                | PH-1         | Z49098    | X55129    | EF646763  |
| Rodentia      | Cricetidae       | <i>Microtus arvalis</i>           | AY220770  | TULV               | M5320v       | NC_005227 | NC_005228 | NC_005226 |
| Rodentia      | Cricetidae       | <i>Oligoryzomys longicaudatus</i> | AF346566  | ANDV               | Chile9717869 | NC_003466 | NC_003467 | NC_003468 |
| Rodentia      | Cricetidae       | <i>Peromyscus maniculatus</i>     | AF119261  | SNV                | NMH10        | NC_005216 | NC_005215 | NC_005217 |
| Macroscelidea | Macroscelididae  | <i>Elephantulus edwardii</i> *    | DQ901019  |                    |              |           |           |           |
| Macroscelidea | Macroscelididae  | <i>Elephantulus intufi</i> *      | DQ901206  |                    |              |           |           |           |
| Macroscelidea | Macroscelididae  | <i>Elephantulus rupestris</i> *   | DQ901201  |                    |              |           |           |           |
| Chiroptera    | Hipposideridae   | <i>Hipposideros cineraceus</i> ** | KX458067  |                    |              |           |           |           |
| Chiroptera    | Hipposideridae   | <i>Coelops frithi</i> **          | DQ888674  |                    |              |           |           |           |

– indicates that no sequences are available.

\* Outgroup for writing host phylogenetic tree.

\* Supplemental host for writing host phylogenetic tree.

Abbreviations: ANDV, Andes virus; ARTV, Artybash virus; ARRV, Ash River virus; ASAV, Asama virus; AZGV, Azagny virus; BOWV, Bowé virus; BRNV, Brno virus; CBNV, Cao B ăng virus; DKGV, Dakrong virus; DOBV/BGDV, Dobrava-Belgrade virus; HTNV, Hantaan virus; HOKV, Hokkaido virus; HUPV, Huangpi virus; JJUV, Jeju virus; JMSV, Jemez Springs virus; KKMV, Kenkeme virus; KMJV, Kilimanjaro virus; LAIV, Láibín virus; LQUV, Lóngquán virus; MAKV, Makokou virus; MGBV, Magboi virus; MJNV, Imjin virus; MOYV, Mouyassué virus; MUJV, Muju virus; NVAV, Nova virus; OXBV, Oxbow virus; PHV, Prospect Hill virus; PUUV, Puumala virus; QZNV, Quezon virus; RKPV, Rockport virus; SANGV, Sangassou virus; SEOV, Seoul virus; SNV, Sin Nombre virus; SOOV, Soochong virus; SWSV, Seewis virus; TGNV, Tanganya virus; TIGV, Tigray virus; TPMV, Thottapalayam virus; TULV, Tula virus; ULUV; Uluguru virus; XSV, Xuân Sơn virus; YKSV, Yákeshí virus.
